# Supplementary material
Source: PubMed Central journal article supplement (PMC4337068)

**A**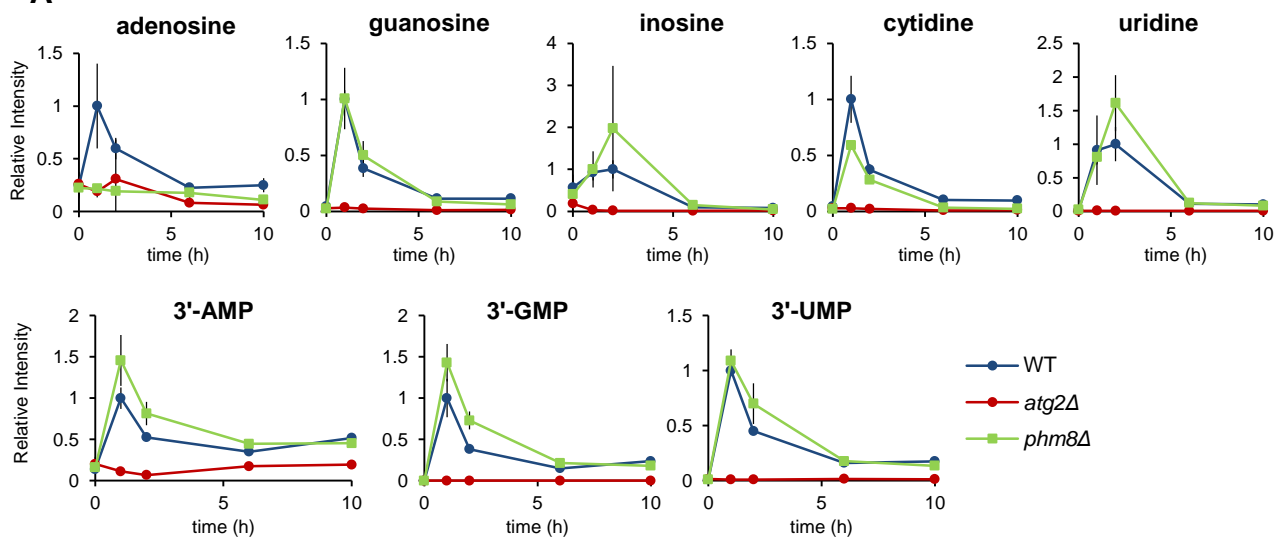

**A**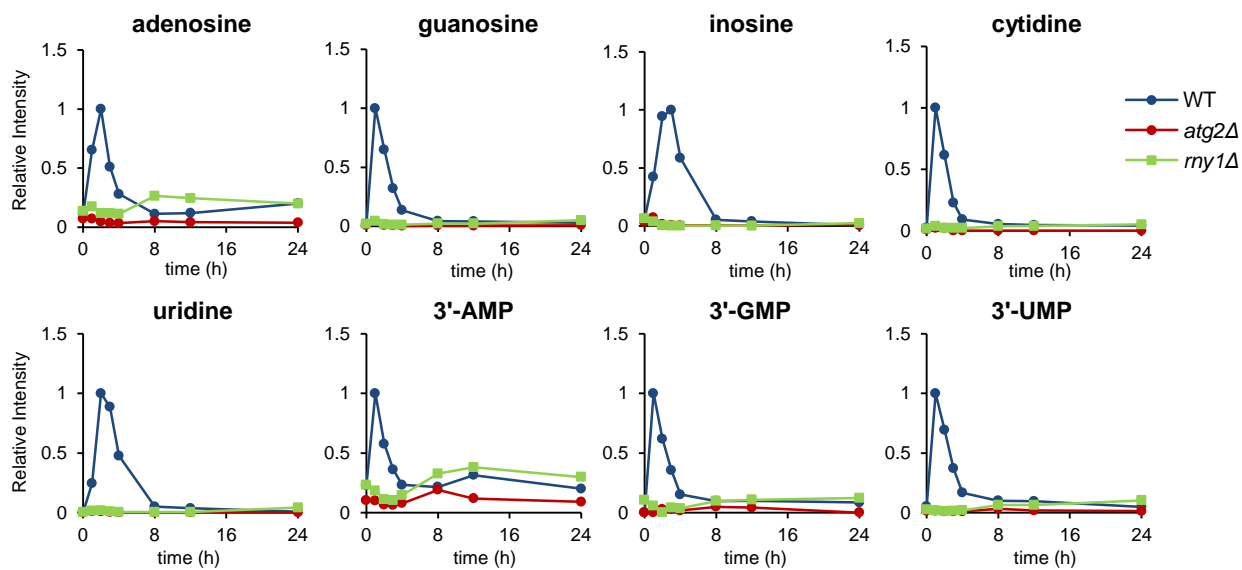**B**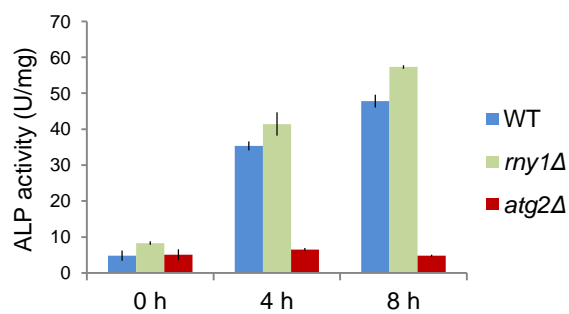**C**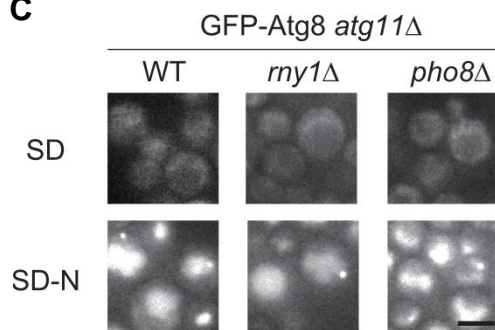

**A**

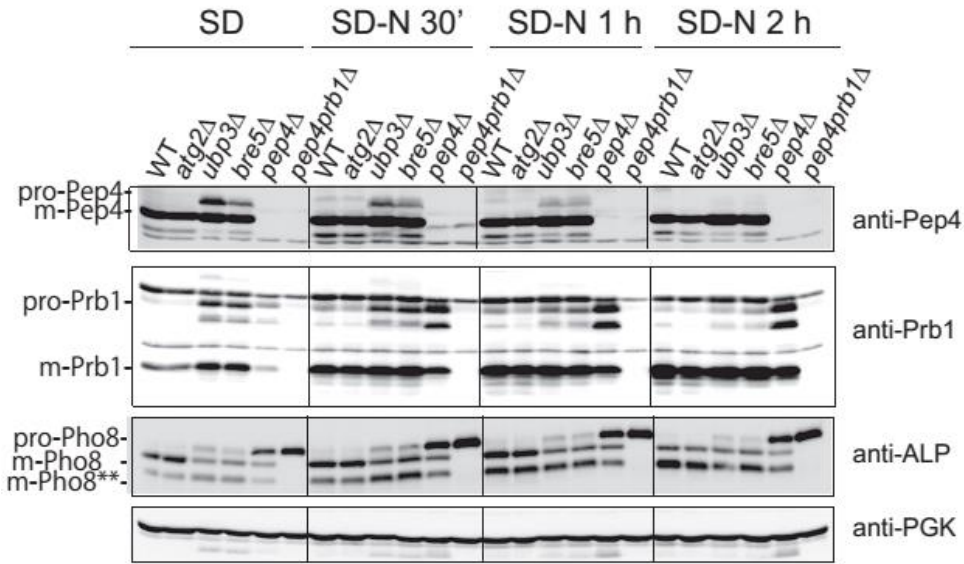

**B**

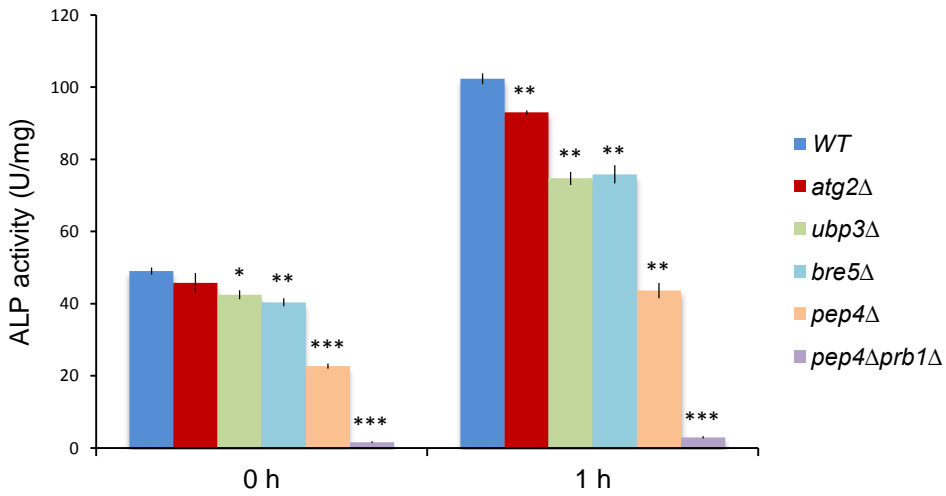

**A**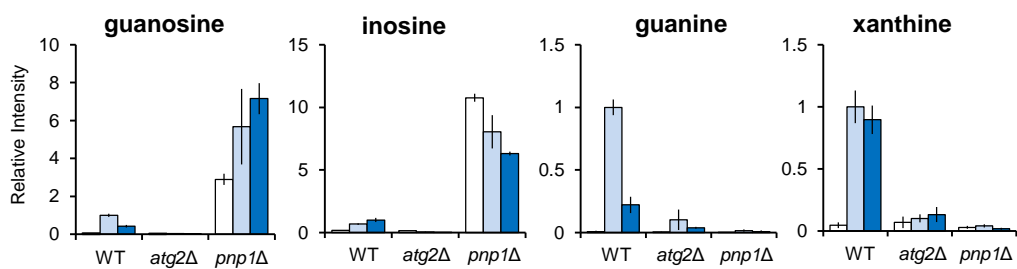**B**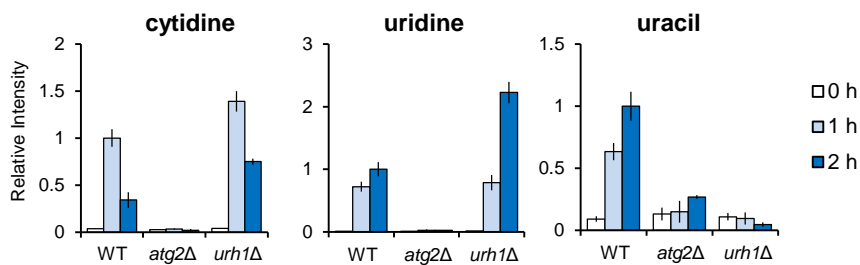**C**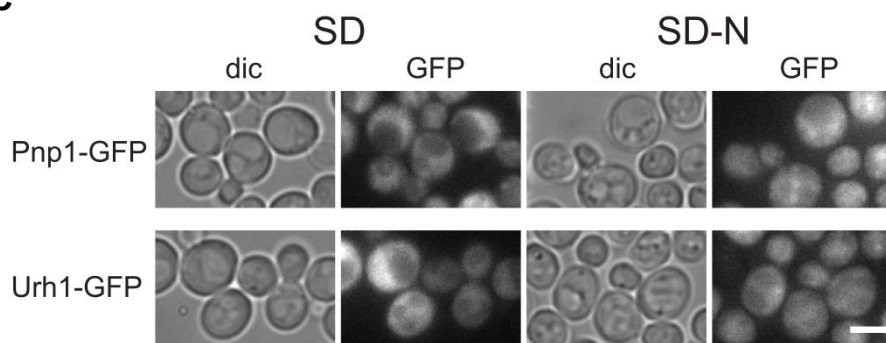

A

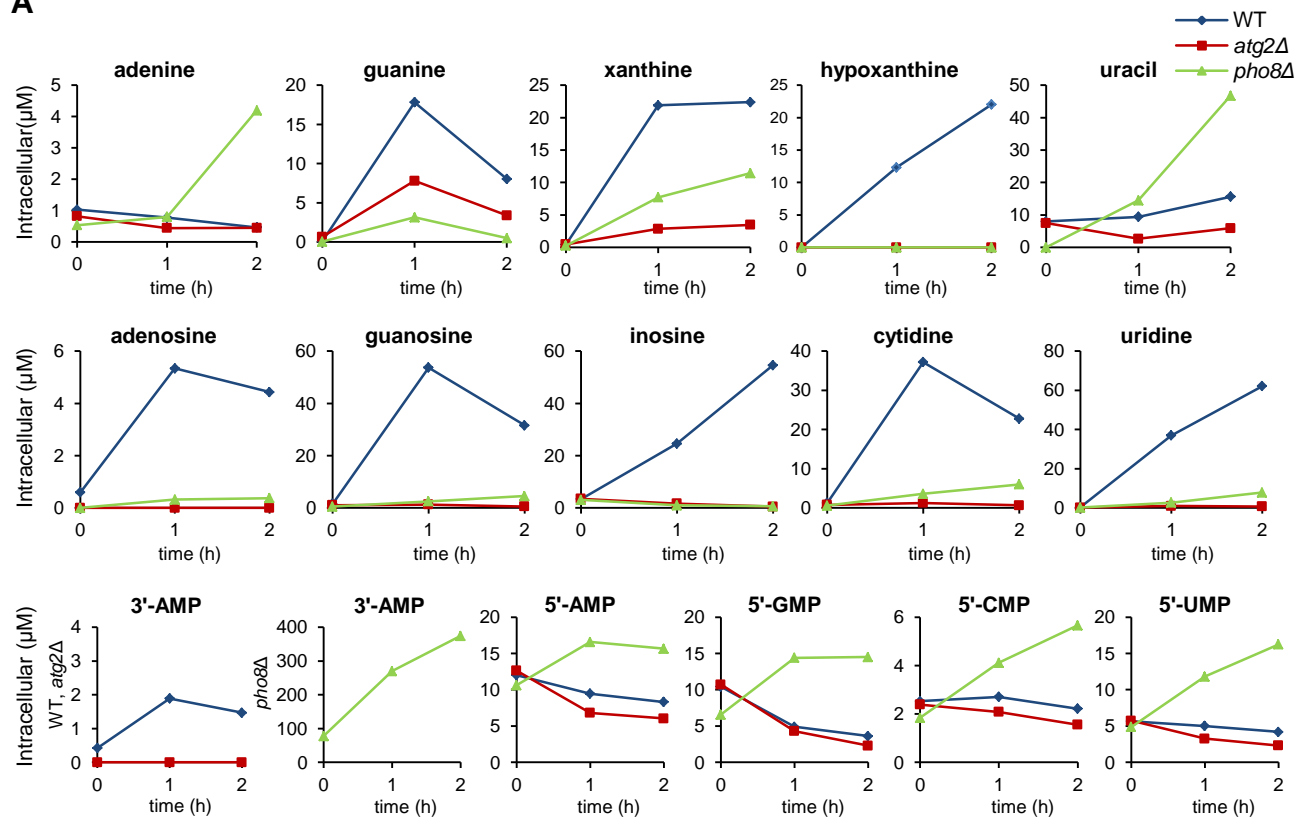

B

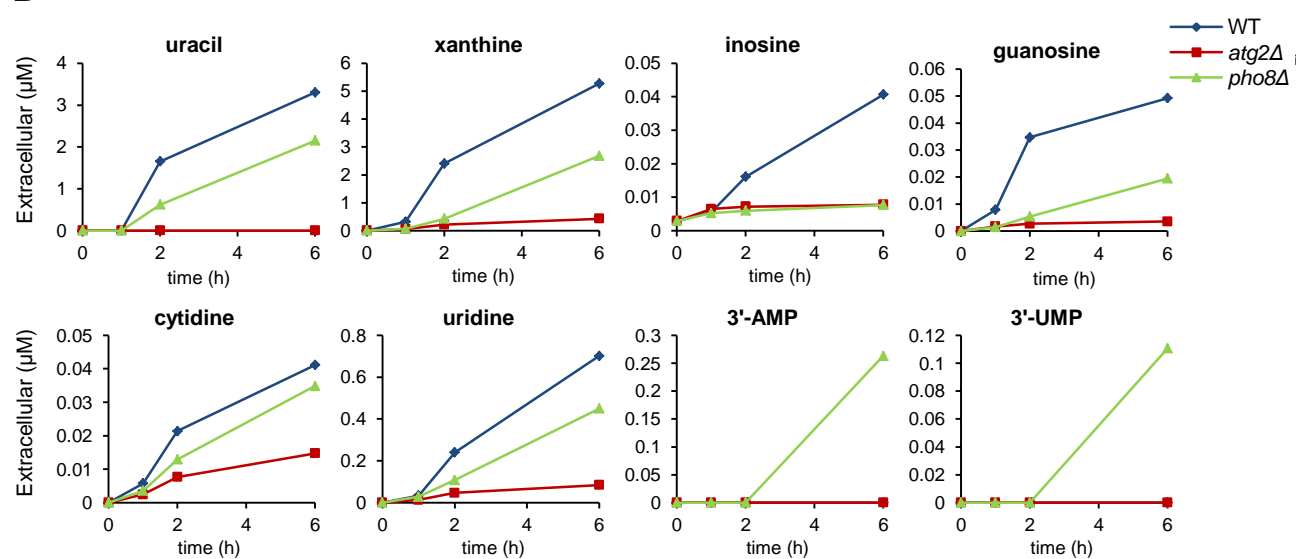

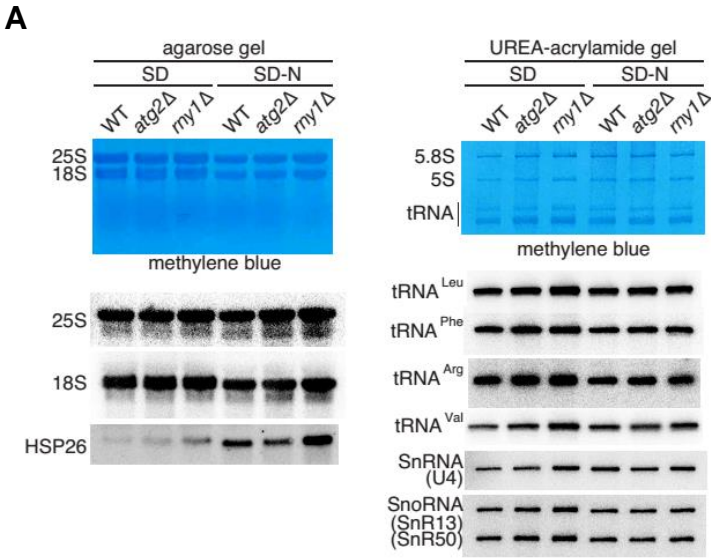

**B Northern blot (normalized to snRNA (U4) levels)**

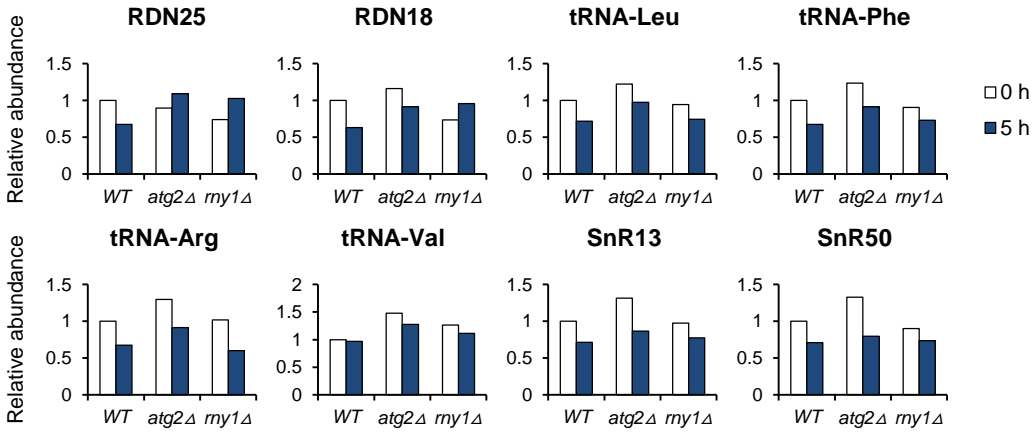

**Northern blot (normalized to snoRNA (SnR50) levels)**

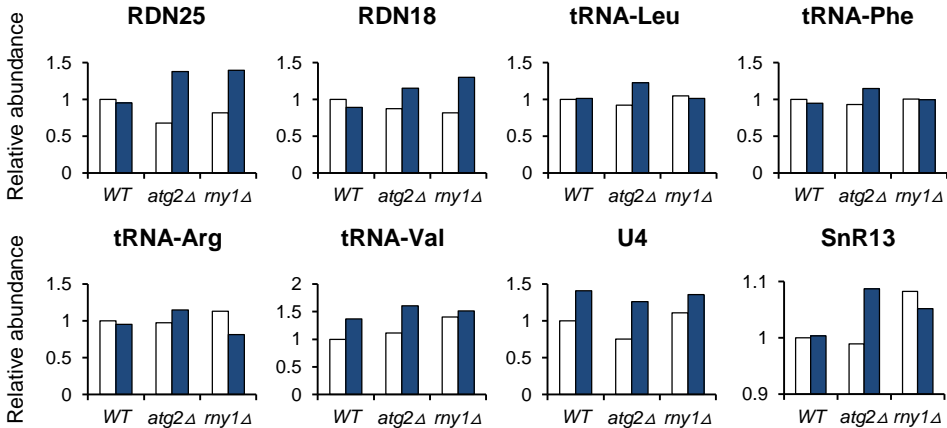

**C RT-PCR (normalized to snRNA (U4) levels)**

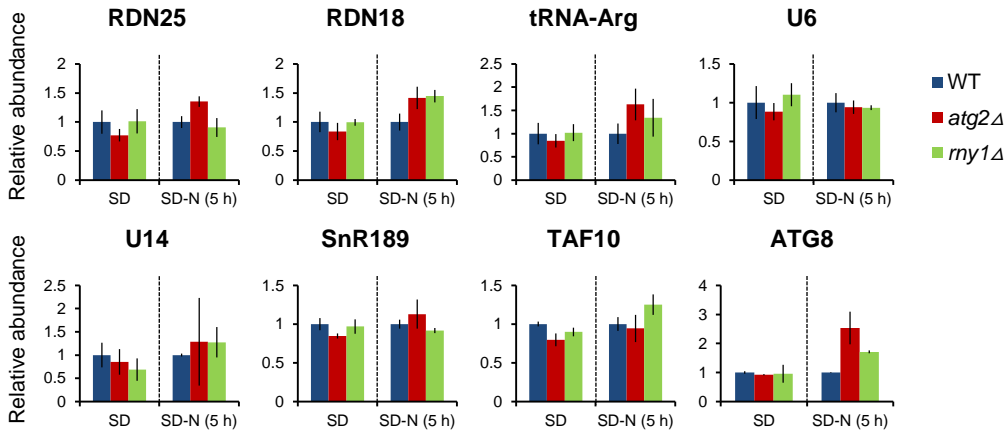

**RT-PCR (normalized to snoRNA (SnR189) levels)**

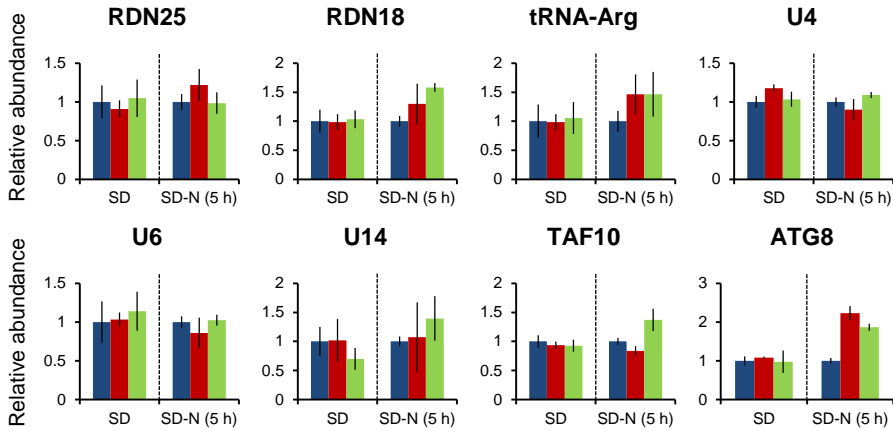

Supplement: embj0034-0154-sd1.pdf [file embj0034-0154-sd1.pdf]
